# Supplementary material for: The AraC-Type Transcriptional Regulator GliR (PA3027) Activates Genes of Glycerolipid Metabolism in Pseudomonas aeruginosa
Source: MDPI journal article supplement (doi:10.3390/ijms22105066), 2021-05-11
Supplement: s1 [file s1]

# The AraC-type transcriptional regulator GliR (PA3027) activates genes of glycerolipid metabolism in *Pseudomonas aeruginosa*

Karolina Kotecka, Adam Kawalek, Kamil Kobylecki, Aneta Agnieszka Bartosik\*

Institute of Biochemistry and Biophysics, Polish Academy of Sciences, 02-106 Warsaw, Poland

\*Correspondence: anetab2@ibb.waw.pl

## Supplementary Materials

**Text S1:** Sequences of PA3027 ChIP-seq peak summits used for motif searching (peaks marked by numbers and gene ID identified in the vicinity, see Table 2).

>1 PA0235

CCGCGAGCGGTTATGCGCCCTACGCGATGCCGACCCCTGGGGTAGGGCGAATAACGCCACCGGCGTTATCCGCCG  
ATACACCGAAGCCCGGCGGCGGATAACCGCAAGCGGTTATGCGCCCTACGCGATGCCGACCCCTGGGGTAGGGCG  
AATAACGCCATCGGCGTTATCCGCCGATACACCGAAGCCCGGCGGCGGAT

>2 PA4045

TAACGCCGGTGGCGTTATTGCGCCCTACGGCAATTGGGGGGTAGGGCGAATAACCGCAACGCGGTTATCGCTGCCA  
GTCGGCGGGGCATGTGCGTATGGTGGTGTATCGGCGGATAACGCCGGTGGCGTTATTGCGCCCTACGGCAATTGGG  
GGGTAGGGCGAATAACCGCAACGCGGTTATCCGCCGTTGTGCTGGGTTT

>3 PA3572

CGCCTGAGCGCGGATCAGGCCGTTTCGCTGTTTTAGTTTCGGGCAGCACATGGGGCGCGCGCAGGCGCGCCTCGAGG  
CGGTCGACGAAACGCCGGGCTCGCTTTTCGCTACGGAAGTTGACGGCCTGCTGGTTCGAGGCAGACTTGCCAGCAT  
TGGCCTTTTCGGGGTTTTCGACGGGCGGACGAGGATGTTTCATGGCGATTCA

>4 PA3464

ATGTCGGGAAAGTCTAGCCGCTGGCGCCTGGGCGCCATTGATGGCGGTCATGGGGCCGGCCCGGCGTGGATAGA  
CATTGGTCCGATGGCGCTATCGGAGAGTTCCGATGTCCAGGCAGGACAGTGCCCTGGGTGTCCCGCATTTGGTAGG  
CTTGCCGGCACCGAGTCGAGACAAGAGCGAAAAGCCGATGAAGTTGCTGT

>5 PA3464

GAGCTGGGGCGCAGTCCGGCTTTTTTCGGGGTGTGTAGGGCGAATAACGCCACGGGCGTTCATCCGCCGATGTGCGG  
GATGAGCGGCGGATGACCGCGAGCGGTTATTGCGCCCTACGGAGCTGGGGCGCAGTCCGGCTTTTTTCGGGGTGTGT  
AGGGCGAATAACGCCATGGGCGTTATCCGCCGATGTGCGGGATGAGCGGC

>6 PA3397

TCCTTGCGCCCCGTCCGCGGGAGCGATGGGAGCCCTCGGCGGCCGGCGGCCGACCGATATCGTGTTATCCCATAT  
CCATATTCTGGATAAGCATTATCCAGACAATTCATTTTGGCGATATTTTGGCAACCGATAAAATGCCGCGCAACT  
GCGTCACGTCTGCTGCTGTTGGTGTGCGCCCGCTTTTCCTAGGAGTCTT

>7 PA3391

ATCTCGCGGAACCTCCGGCATGCCTTCGGCGTAGACGTCCGACAGGCGCTGGTAGTCGAGGTCGCGGAAGCTGATG  
ATGTCGCGGAACCTGGCGCAGTTGGACCCGATCGAAGATGCCACCGCGCACGTAGCCGGAACCCCTGAAGGAATAC  
TCGCCGTCGCCGAGCACGACGAAGGCGTATTGCCTGGCTTCAGCGACGC

>8 PA3342

AGCGTCTCTACGATCTCTACGAGCATGCCGATCGCGCGCTTTACGAAGCCAAGGCGTTTCGGCCGTAACCAGGTGG  
TGGCCTGAGTCCATGGCCGATTTTGTCCCTGTGGCTGGCGCCCGGTGACTGCGGGACGAGGCGGCGAATGCTA  
GGTTCGACAGGAAAAAATGCCAGGCACAGCCGCTCTTCGACAGAGCTGCCG

>9 PA3341

CACATTTTCGGCACCTTGCTAGCCCAGACTTCCCGTGCTTGGCGCGCTGAACTCGACCGCCGCCCTCAGTCACCTC  
GGCCTGTCCCAGGCGCGCTGGTTGGTGTGTTGCATCTGGCGCGCCATCGCGATTTCGCCACCCAGCGCGAGTTG  
GCCAATCGGTTCGGGGTCGAAGGCCCCACCTGGCGCGGCTGCTCGACGG

>10 PA3309

CGGCGATTTCCTCGCTGGCGCGCTCCTGGCAGACGCGATCGAAGGTGGCGCCTTCGACGTTGCTCGCCTCGACCT  
TCTCGCGGGCCTTGGCCAGGACGTCATCGGCGGCTTTCAGCGCGCTTCGCGCAGCGGCTCGGGTTGTAGTACA  
CCGCGTAGTCGGGAAGGTGGCGCAGCGGGCTGTTCGACGATGGTGATGACG

>11 PA3083

TCGCTTCACTGTTTTCCATTGATGGAGTCCGCTTAATCGTGTTTTCGCGAACCTCCCTGCGCAGGCTCTGCGAAGG  
GACTTTTCGCGCCACCGGCGAAATTCGCCTGGCGCGTTTTGTTCGGACACTTCCTGTTTTCTGGTCAGTGAATGAA  
CAGTCATCCCGCAGGAAGTCCTGTTTTTTTCGCAATCCATTGAATTGCCT

>12 PA2742

ATCGCTCCCAAGAAGAAAAAGTAACCACCAGGGCACTGGCAGGCCCTTGCGGTTATGCGTAATCACTCAATGCGGA  
GTATCCGAACATGCCAAAGATGAAGACCAAAAGTGGCGCGGCCAAGCGCTTCAAGAAGACTGCTGGTGGCCTCAA  
GCACAAGCACGCCTTCAAGAGCCACATCCTGACCAAGATGACCACCAAGC

>13 PA2601

GGATGACATGCGGGGATTCACTCCGGGAAGTTCTGGCGGTACGGTAGCAAACGCTTTTTTATTCTGAAATGCAT  
TTTGATCTAAGCTAATATGCGAGAAATGCAATTGGTGCCGGCCCCATGAAAATCGATGACATCGACGCCTTCGT  
CGCGGTGATCCGCAACGCTTCCCTGAGCCAGGCCGCCGAGAGCCTGGGCC

>14 PA2601

CGGCTACGCATAGTGTCCGCCTTGGGAAACGAAAAGACGGAAAAGCTAAATATGCGCTTTTAGCATATTAAGATA  
TGACAAAATGAATTTCCATCATGTAGTTTTAGCCTGTAGCTTCTAAGAAAAGCACCCATGCAGATGTTTTTCTT  
ATAACGACAGCCGCCAACCTTATCAGTCGAGCGGCCAGGCGAGGGCAAC

>15 PA2147

TGACCAGCACGCTCTCGCCGGCCGCGTTGACCAGGCGGAAGGTGTGCACGCCGAAGCCCTGCATGTTGCGGTAGG  
CGATCGGAATGGCGCGATCGGACATCAGCCACATGACCATGTGCGCCGACTCCGGGGTCAGCGAAACGAAGTCCC  
AGAAGGTGTGTCGGCAGACGCTCCGGTGGGAATCTCGTTGTGCGGTTTCG

>16 PA1414

CTGGCCAGCGCCGAGGCGGAGGCCAGAGCGTCGGGGAACCGGCTCAGCGACGTTGCCGCGCGGCGAGGCGCCGG  
CGTTGCTCGTCGTTTTTCCACCGGGATGGGTTGCATGCGCGGGGGCTCGATCAGGCCAAGGGCGACACCGAGTTGC  
CACGCCAGGTTTTGCAGCCAGAGTTTCATGACAGGCCCTTGTCCAAGGG  
underline

>17 PA1196

CAGGCCGCTGGCACGGTTGTAGTAGACGAAGCGACCGGAGGGGTGACCAACCGTGACCGGTTGCCGCAGGCCGTC  
GAAAATCGGCGCCAGGCAGTCCACCAACCAGGCCAGTTCACCGCTTCGCGTGGAAATCGTCGGTTCTCTGACAAAG  
CGCCATGCTCTCCCCCTCGGTTTTCCCGGATGTGCAAAATCTCGTCAGTTGT

>18 PA0928

TGGGTCCAGCTGTCCGACATGCGCGCCAGTTGATCGAGCGCGGGCAACTGATCGCCGAACAACGGCGCCGCTG  
GCCGCCACCGCGCTGGCGCGAAAGGATACCGCCGTGCTCAACCGCATCGCCAACGAGGCGCTGGACCAACCGGAC  
GTGCGCGCGGTGACCTTCCTCGACGCCCGCCAGGAACGCCTCGCCCATGC

>19 PA4610

CTGGGCGTGATGCGCGCCTGCGCCTGATCCCGAACCTGGACGCCGAGAGCCTGCCGAAGCTGGGCTGGCACATC  
GCCGCGATCACCTGGTGGGCTGGGTTTTCGTCGCGGTTCGGACAGAGTTTTCCGTTTCGGCGGCGCCTTCTGAGCA  
TGCCCATATGAAAAAGGGCGCCGAGGCGCCCTTTTTTCATGCCGTTGTTCG

>20 PA4772

GAAGCGGCGGATAGCGCCGCTGGCGCTGTTTCGCCCTACCTCACGACTCCCACCGGTAGGGCGAATAACCGCTCGC  
GGTCATCCGCCGGGCCATGCTCCGAGAAGCGGCGGATAGCGCCGCTGGCGCTATTTCGCCCTACGTCAGGCGAAA  
TGGCTGCTCCGGCGTCGTGCGCCCGCGCCGGGTTCGGGCAAAAAATCCGTC

>21 PA5208

GGCGCTGGCGTCCACCGAGCGCTGCACATAGGCGAGCATCTGGCCTTGTAGCGGCAACGGGATGCGCATGCGCCG  
GCCAGCATCAGCCCGGCGATGTCCTTGGCGCGATTGGCGACTTTGTCTGTACACTGAGCAGCTCCAACAGATC  
GGAGCGCGGACCGGAAGGAACAGGCTCTTGGGCAAGGTGCATCCGGACGT

>22 PA5243

GCGGCCTGCTTGGCGAAGTAGGTCAGAATGCCATCGGCGCCGGCACGTTTGAAGGCGGTAAGGGATTTCGAGGATC  
ACCGATTTCGGCCAGCCAGCCGTTCTGGATGGCGCCCATGTGCATCGCATACTCGCCGCTGACCTGGTAGACAAAAG  
GTCGGGGCGCGGAATTCATCCTTCACCCGACGCACGATGTCGAGGTAGGG

>23 PA5294

GGCGGCAGCCTCGAAGGCGCGCAGGGCATAACAGCGGGGGCAGGCGACGGGTCATTGGGGAATTACCTCTTTCATG  
ACTTTTACTCATGCCTGGCATCTTGTTTTTCCTTTTGTGGAGCCATGCCAGTCGCACCGAGAATAGCCGCATTCT  
CAACGCCGACAGGCCATCGCGGCAACCATCTCCTCCTGAGCCTTACTCAT

>24 PA3026

GACCAGCTTCTCGTAGGGCGTGATGCGGCTCATGGCCTCGCCAGGGTGGCGCAGTTCATCGCGATGTAGCCGAG  
CACGCTCCAGGAGCCGGGCTGGACGAAACGCGCCGAATGCAGGCCGAACAGGGGATCGCCGGAATGCTCGCAGAA  
ATAGCCGAGCAGGTGCTCGTGGGCTTCGCCCCGCGAGGCGCTGGCGATTGTCGTTGAGCTGGTCGGCCTGGAGGCC  
GGCGGCGGCCAGGGCAGGGGCGATGTCCAGGCCGAGCCGTTTCGGCATGGCGCAGGTATTTACAGCAGGGCCGGAAC  
CGAGGTGGAGCCAAGGGTCTGCATGGTCGTTGTTCTTGTCGTGGCGGGTGGAAACAGGCCGTCCGGCGTGCGTGCC  
GGCTGTCTTGATCGGTACAGGGAGTGTCTCGATCCGACAGTGACAGGCGAGGGCGGCTGGCTAGTATAGGCAGC  
CAGAAAGGTTCCGATAAACAGGTTGCCGCGACAAGCGAGGGGAGAGGTTTC
